# Supplementary material for: Total and regional body adiposity increases during menopause—evidence from a follow‐up study
Source: PubMed Central journal article supplement (PMC9197413; doi:10.1111/acel.13621), 2022-05-04
Supplement: ACEL-21-e13621-s001.pdf [file ACEL-21-e13621-s001.pdf]

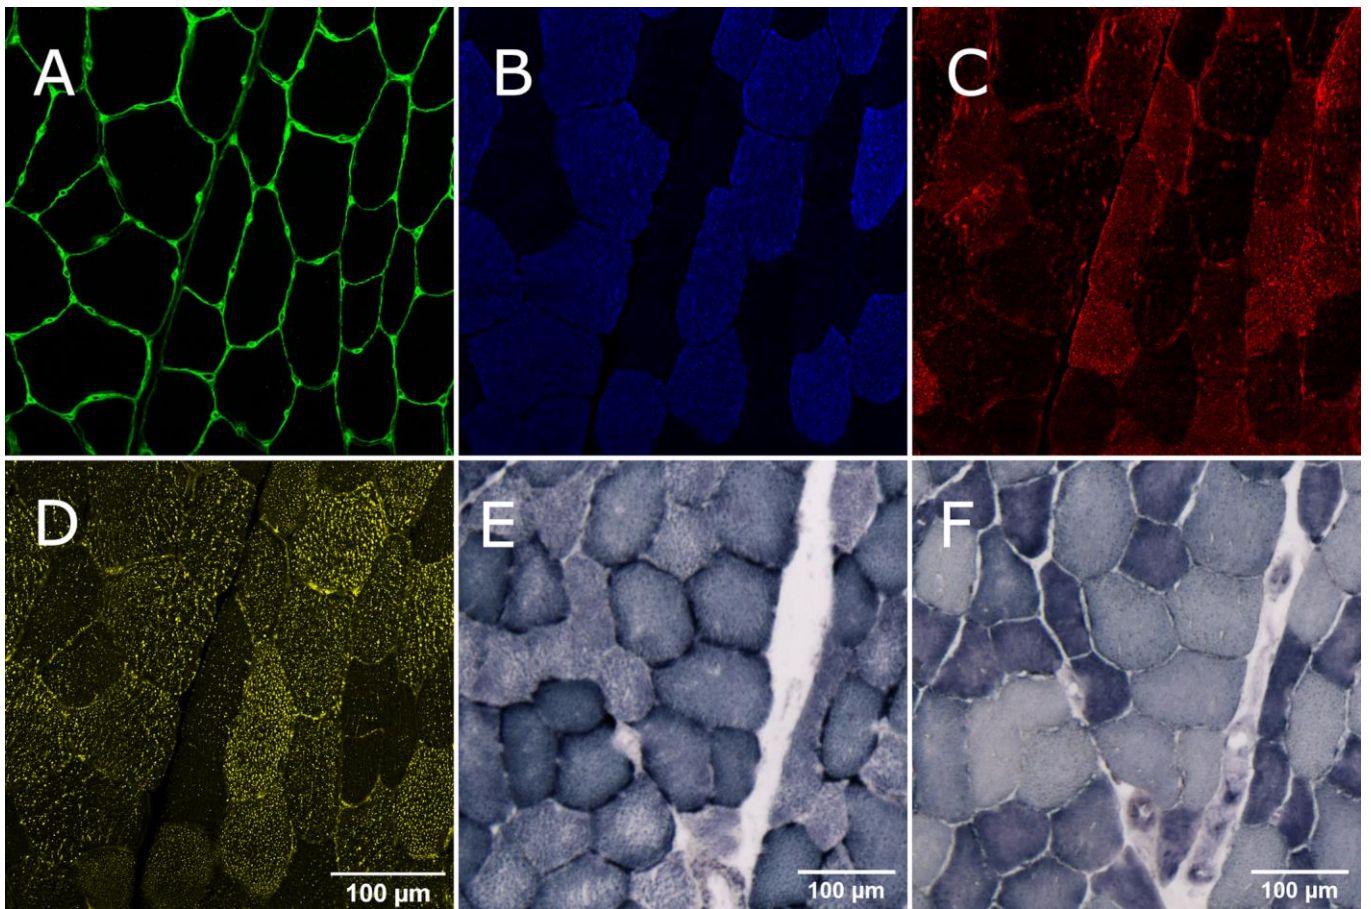

**Supplemental Figure 1. Representative staining images.** A: Cell borders, B: Type I fibers, C: Type IIX fibers, D: Lipid droplets, E: Succinate dehydrogenase, F:  $\alpha$ -glycerophosphate dehydrogenase. Images A-D are layers of a single confocal microscopy image (sections B and C enhanced here only for visual purposes). Images E and F are from sequential sections.
