# Supplementary material for: Total and regional body adiposity increases during menopause—evidence from a follow‐up study
Source: PubMed Central journal article supplement (PMC9197413; doi:10.1111/acel.13621), 2022-05-04
Supplement: ACEL-21-e13621-s002.pdf [file ACEL-21-e13621-s002.pdf]

## SUPPLEMENTARY MATERIAL

**Supplemental Table 1.** Baseline characteristics of the participants taking part either in the short-term, long-term or both follow-ups.

Baseline population consists of the following subpopulations:

- 54 participants, who were premenopausal at ERMA baseline and were re-measured only at long-term follow-up.
- 230 participants, who were perimenopausal at ERMA baseline and completed the short-term follow-up.
- 32 participants, who were perimenopausal at ERMA baseline and were re-measured only at long-term follow-up.

|                                      | All<br>(n = 316) | Premenopausal<br>(n = 54) | Perimenopausal<br>(n = 262) |
|--------------------------------------|------------------|---------------------------|-----------------------------|
| <b>Age and systemic hormones</b>     |                  |                           |                             |
| Age, y                               | 51.4 ± 1.9       | 51.0 ± 1.7                | 51.5 ± 1.9*                 |
| E <sub>2</sub> , nmol/L              | 0.40 ± 0.40      | 0.70 ± 0.71               | 0.33 ± 0.27***              |
| FSH, IU/L                            | 30.2 ± 22.2      | 7.9 ± 3.7                 | 34.8 ± 21.6***              |
| DHEAS, μmol/l <sup>a</sup>           | 2.73 ± 1.40      | 2.49 ± 1.48               | 2.77 ± 1.38                 |
| SHBG, nmol/l <sup>a</sup>            | 56.4 ± 24.3      | 60.7 ± 32.0               | 55.5 ± 22.4                 |
| <b>Demographics</b>                  |                  |                           |                             |
| Education level <sup>a</sup>         |                  |                           |                             |
| Primary                              | 2.2%             | 0.0%                      | 2.7%                        |
| Secondary                            | 51.7%            | 55.6%                     | 51.0%                       |
| Tertiary                             | 46.0%            | 44.4%                     | 46.4%                       |
| Bleeding status                      |                  |                           |                             |
| Natural                              | 59.5%            | 35.2%                     | 64.5%***                    |
| IUD                                  | 33.9%            | 50.0%                     | 30.5%                       |
| Hysterectomy                         | 6.6%             | 14.8%                     | 5.0%                        |
| <b>Lifestyle habits</b>              |                  |                           |                             |
| SR-PA, MET-h/day <sup>b</sup>        | 4.67 ± 4.07      | 4.79 ± 3.80               | 4.64 ± 4.12                 |
| ACC-PA, min/day <sup>c</sup>         | 53.6 ± 30.3      | 53.5 ± 27.1               | 53.6 ± 31.0                 |
| Diet quality score <sup>d</sup>      | 5.84 ± 2.32      | 5.27 ± 2.72               | 5.95 ± 2.22*                |
| Smoking                              |                  |                           |                             |
| Never                                | 69.6%            | 74.1%                     | 68.7%                       |
| Quitter                              | 23.7%            | 20.4%                     | 24.4%                       |
| Current smoker                       | 6.6%             | 5.6%                      | 6.9%                        |
| Alcohol use, units/week <sup>e</sup> | 4.0 ± 3.6        | 3.7 ± 3.1                 | 4.1 ± 3.7                   |

Values are presented as mean ± SD. E<sub>2</sub>, estradiol; FSH, follicle-stimulating hormone; DHEAS, dehydroepiandrosterone sulfate; SHBG, sex hormone binding globulin; IUD, intrauterine device (includes also other progestogenic contraception preparations); SR-PA, self-reported physical activity; MET, metabolic equivalent of a task; ACC-PA, accelerometer-measured moderate-to-vigorous physical activity. <sup>a</sup> Data missing, n = 1 from perimenopausal group. <sup>b</sup> Data missing, n = 3 from premenopausal and n = 5 from perimenopausal group. <sup>c</sup> Data missing, n = 8 from premenopausal and n = 48 from perimenopausal group. <sup>d</sup> Data missing, n = 3 from premenopausal and n = 7 from perimenopausal group. <sup>e</sup> Data missing, n = 2 from premenopausal and n = 5 from perimenopausal group. \*\*\*p < 0.001, \*\*p < 0.01, \*p < 0.05 between menopausal groups.

**Supplemental Table 2.** Baseline anthropometrics and body composition results of the participants taking part either in the short-term, long-term or both follow-ups.

Not all participants took part in all of the anthropometrics and body composition measurements both at baseline and follow-up visit. The baseline population with a minimum of scale measured body mass consists of the following subpopulations:

- 49 participants, who were premenopausal at ERMA baseline and were re-measured only at long-term follow-up.
- 230 participants, who were perimenopausal at ERMA baseline and completed the short-term follow-up.
- 28 participants, who were perimenopausal at ERMA baseline and were re-measured only at long-term follow-up.

|                                            | <b>All<br/>(n = 307)</b> | <b>Premenopausal<br/>(n = 49)</b> | <b>Perimenopausal<br/>(n = 258)</b> |
|--------------------------------------------|--------------------------|-----------------------------------|-------------------------------------|
| Body mass, kg                              | 69.6 ± 10.9              | 68.7 ± 10.4                       | 69.7 ± 11.0                         |
| Height, cm                                 | 165.3 ± 5.5              | 166.2 ± 5.1                       | 165.1 ± 5.6                         |
| BMI, kg/m <sup>2</sup>                     | 25.5 ± 3.9               | 24.9 ± 3.6                        | 25.6 ± 3.9                          |
| <i>Underweight (&lt;18.5)</i>              | 0%                       | 0%                                | 0%                                  |
| <i>Normal weight (18.5–24.99)</i>          | 51.8%                    | 57.1%                             | 50.8%                               |
| <i>Overweight (25.0–29.99)</i>             | 34.5%                    | 34.7%                             | 34.5%                               |
| <i>Obese (&gt;30)</i>                      | 13.7%                    | 8.2%                              | 14.7%                               |
| <b>Total and regional fat <sup>a</sup></b> |                          |                                   |                                     |
| Total fat mass, kg                         | 25.1 ± 8.7               | 22.8 ± 8.0                        | 25.5 ± 8.8*                         |
| Total fat-%                                | 35.1 ± 7.8               | 32.4 ± 7.6                        | 35.6 ± 7.8**                        |
| Trunk fat mass, kg                         | 12.8 ± 5.3               | 11.7 ± 4.8                        | 13.0 ± 5.4                          |
| Gynoid fat mass, kg                        | 4.9 ± 1.4                | 4.4 ± 1.4                         | 5.0 ± 1.4*                          |
| Android fat mass, kg                       | 2.2 ± 1.0                | 2.0 ± 0.9                         | 2.3 ± 1.0                           |
| Right leg fat mass, kg                     | 4.4 ± 1.5                | 3.9 ± 1.5                         | 4.5 ± 1.5*                          |
| Gluteofemoral fat mass, kg                 | 10.1 ± 3.4               | 9.1 ± 3.0                         | 10.3 ± 3.4*                         |
| Gluteofemoral fat-%                        | 36.0 ± 6.9               | 33.5 ± 6.8                        | 36.4 ± 6.8**                        |
| Android-to-gynoid-ratio                    | 0.45 ± 0.14              | 0.45 ± 0.16                       | 0.45 ± 0.14                         |

Values are presented as mean ± SD. BMI, body mass index. <sup>a</sup> Data missing *n* = 1 from premenopausal group and *n* = 9 from perimenopausal group. \*\*\**p* < 0.001, \*\**p* < 0.01, \**p* < 0.05 between menopausal groups
